# Supplementary material for: Real-World Management of Hyperkalemia in the Emergency Department: An Electronic Medical Record Analysis
Source: PubMed Central journal article supplement — Adv Ther. 2021 Dec 27;39(2):1033–44. doi: 10.1007/s12325-021-02017-w (PMC8866290; doi:10.1007/s12325-021-02017-w), 2021-12-27
Supplement: 12325_2021_2017_MOESM1_ESM.pdf [file 12325_2021_2017_MOESM1_ESM.pdf]

Real World Management of Hyperkalemia in the Emergency Department: An Electronic Medical Record Analysis

Jill Davis,<sup>1</sup> Rubeen Israni,<sup>1</sup> Keith A. Betts,<sup>2</sup> Fan Mu,<sup>2</sup> Erin E. Cook,<sup>2</sup> Deborah Anzalone,<sup>1</sup> Harold Szerlip,<sup>3</sup> Lei Yin,<sup>2</sup> Gabriel I. Uwaifo,<sup>4</sup> Eric Q. Wu<sup>2</sup>

<sup>1</sup>Formerly AstraZeneca, Wilmington, Delaware, USA; <sup>2</sup>Analysis Group, Inc., Boston, Massachusetts, USA; <sup>3</sup>Baylor University Medical Center, Dallas, Texas, USA; <sup>4</sup>Ochsner Medical Center, New Orleans, Louisiana, USA

Corresponding Author: Fan Mu

Email: [Fan.Mu@analysisgroup.com](mailto:Fan.Mu@analysisgroup.com)

**Supplementary Table 1. Diagnosis, laboratory, and procedure codes**

|                                   | Type of Code | Code(s)                                                                                                                                                        |
|-----------------------------------|--------------|----------------------------------------------------------------------------------------------------------------------------------------------------------------|
| <b>Diagnoses</b>                  |              |                                                                                                                                                                |
| Acute kidney injury               | ICD-9-CM     | 584                                                                                                                                                            |
|                                   | ICD-10-CM    | N17                                                                                                                                                            |
| Chronic kidney disease stages 3-5 | ICD-9-CM     | 403.01, 403.11, 403.91, 404.02, 404.03, 404.12, 404.13, 404.92, 404.93, 585.3, 585.4, 585.5, 585.6                                                             |
|                                   | ICD-10-CM    | I12.0, I13.11, I13.2, N18.3, N18.4, N18.5, N18.6                                                                                                               |
| End stage renal disease           | ICD-9-CM     | 403.01, 403.11, 403.91, 404.02, 404.03, 404.12, 404.13, 404.92, 404.93, 585.5, 585.6                                                                           |
|                                   | ICD-10-CM    | I12.0, I13.11, I13.2, N18.5, N18.6                                                                                                                             |
|                                   | Procedure    | See dialysis procedure codes below                                                                                                                             |
| Heart failure                     | ICD-9-CM     | 398.91, 402.01, 402.11, 402.91, 404.01, 404.03, 404.11, 404.13, 404.91, 404.93, 428                                                                            |
|                                   | ICD-10-CM    | I09.81, I11.0, I13.0, I13.2, I50                                                                                                                               |
| Hyperkalemia                      | ICD-9-CM     | 276.7                                                                                                                                                          |
|                                   | ICD-10-CM    | E87.5                                                                                                                                                          |
| Hypertension                      | ICD-9-CM     | 401, 402, 403, 404, 405, 437.2                                                                                                                                 |
|                                   | ICD-10-CM    | I10, I11, I12, I13, I15, I16, I67.4                                                                                                                            |
| Type 2 diabetes                   | ICD-9-CM     | 250.00, 250.02, 250.10, 250.12, 250.20, 250.22, 250.30, 250.32, 250.40, 250.53, 250.50, 250.52, 250.60, 250.62, 250.70, 250.72, 250.80, 250.82, 250.90, 250.92 |
|                                   | ICD-10-CM    | E11                                                                                                                                                            |
| <b>Laboratory values</b>          |              |                                                                                                                                                                |
| Potassium                         | LOINC        | 2823-3, 75940-7, 22760-3, 42569-4, 6298-4, 32713-0, 39790-1, 41656-0, 39789-3, 77142-8, 12812-4, 12813-2, 29349-8, 51618-7                                     |
| <b>Procedures</b>                 |              |                                                                                                                                                                |
| Dialysis                          | CPT          | 4052F, 4053F, 4054F, 4055F, 90935, 90937, 90945, 90947, 90965, 90966, 90969, 90970, 90999, 99512                                                               |
|                                   | HCPCS        | G0257, G0322, G0323, G0326, G0327, G0491, G0492, G8081, G8082, G8085, G8714, G8715, G8956, G9264, G9265, G9266, S9335, S9339                                   |

|                   |            |                                                                                                                                                                                                                                                                                                                                                |
|-------------------|------------|------------------------------------------------------------------------------------------------------------------------------------------------------------------------------------------------------------------------------------------------------------------------------------------------------------------------------------------------|
|                   | ICD-9-PCS  | 38.95, 39.27, 39.42, 39.95, 54.98                                                                                                                                                                                                                                                                                                              |
|                   | ICD-10-PCS | 5A1D00Z, 5A1D60Z, 3E1M39Z, 5A1D70Z, 5A1D80Z, 5A1D90Z                                                                                                                                                                                                                                                                                           |
|                   | Revenue    | 0304, 080X, 082X, 083X, 084X, 085X, 088X                                                                                                                                                                                                                                                                                                       |
| Electrocardiogram | CPT        | 33282, 93000, 93005, 93010, 93012, 93014, 93015, 93016, 93017, 93018, 93040, 93041, 93042, 93224, 93225, 93226, 93227, 93228, 93229, 93230, 93231, 93232, 93233, 93235, 93236, 93237, 93268, 93269, 93270, 93271, 93272, 93278, 93351, 93745, 93798, 93799, 94617, 95807, 0178T, 0179T, 0180T, 0295T, 0296T, 0297T, 0298T, 0497T, 0498T, 3120F |
|                   | HCPCS      | E0617, G0004, G0005, G0006, G0015, G0366, G0398, G0399, G0403, G0404, G0405, G8350, G8356, G8704, K0606, S0345, S0346, S0347                                                                                                                                                                                                                   |
|                   | ICD-9-PCS  | 89.51, 89.52, 89.53                                                                                                                                                                                                                                                                                                                            |
|                   | ICD-10-PCS | 4A023PZ, 4A02X4A, 4A02X4Z, 4A02XFZ, 4A02XPZ                                                                                                                                                                                                                                                                                                    |
|                   | Revenue    | 0730, 0731, 0732, 0739                                                                                                                                                                                                                                                                                                                         |

*CPT, Current Procedural Terminology; HCPCS, Healthcare Common Procedure Coding System; ICD-9/10-CM, International Classification of Diseases-Ninth/Tenth edition, Clinical Modification; LOINC, Logical Observation Identifiers Names and Codes*
